# Supplementary material
Source: PubMed Central journal article supplement (PMC3329105)

Figure S3

A. Phylotype I

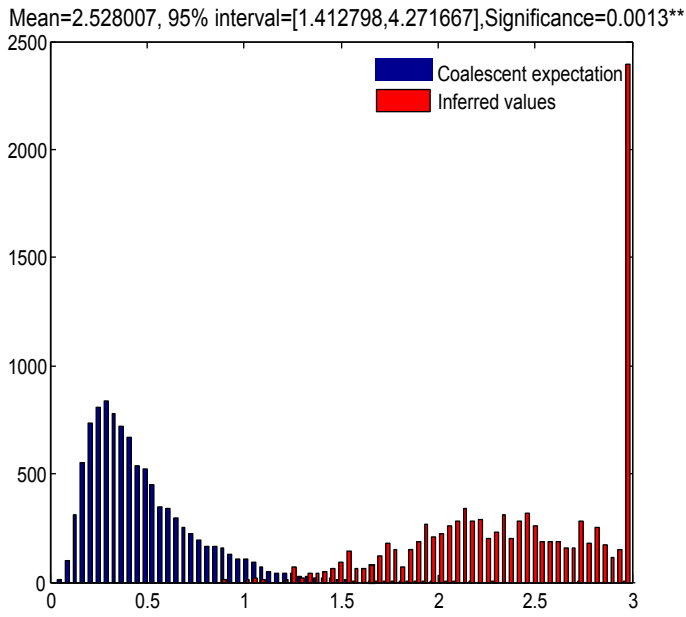

B. Phylotype II

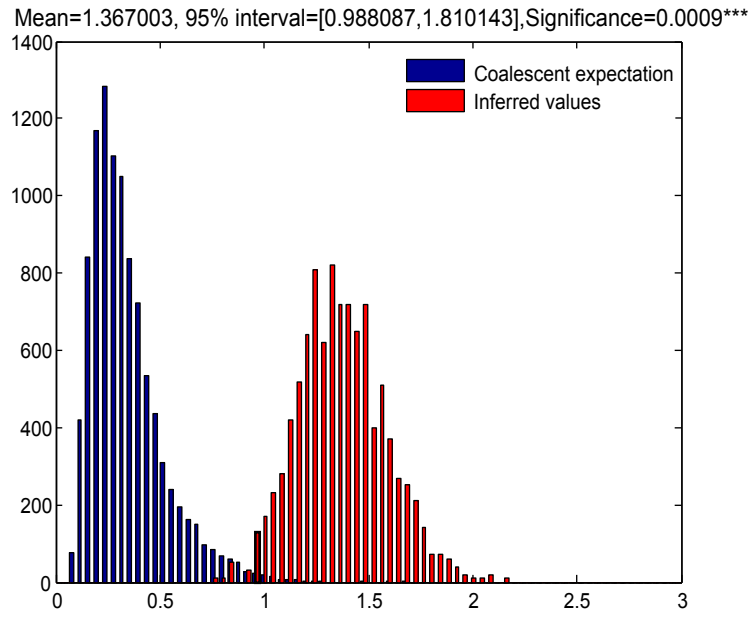

C. IIA (clades 2 and 3)

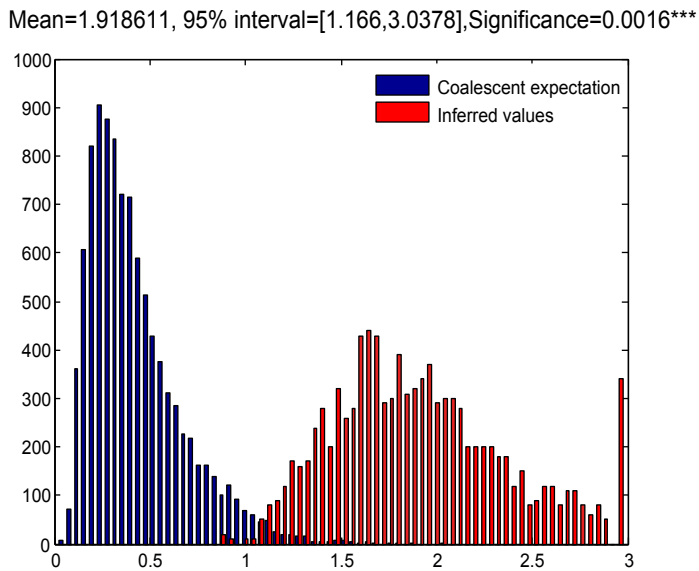

D. IIB (clades 4 and 5)

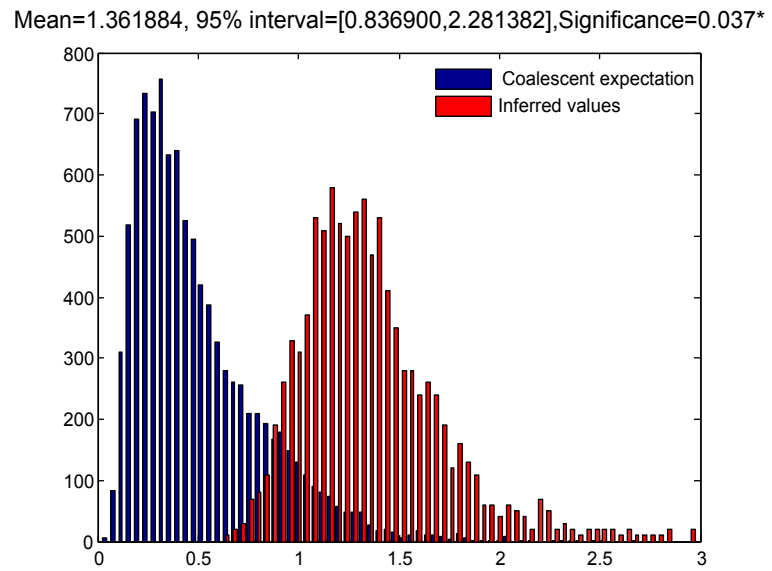

E. Phylotype III

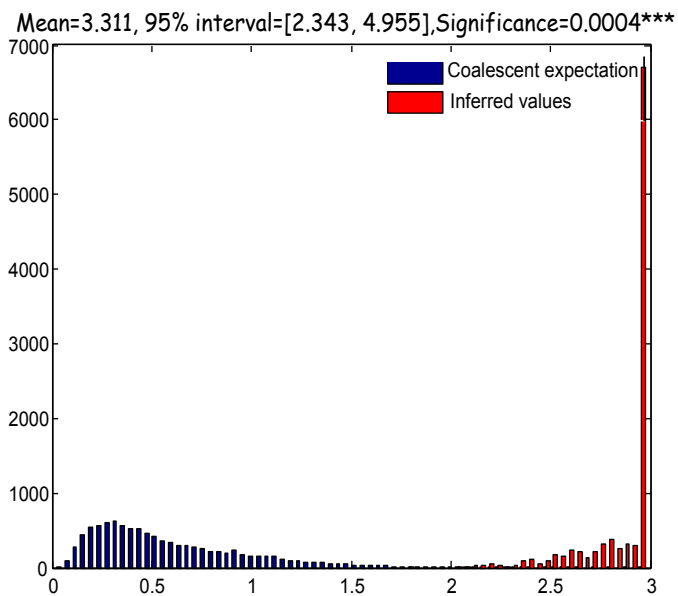

F. Phylotype IV

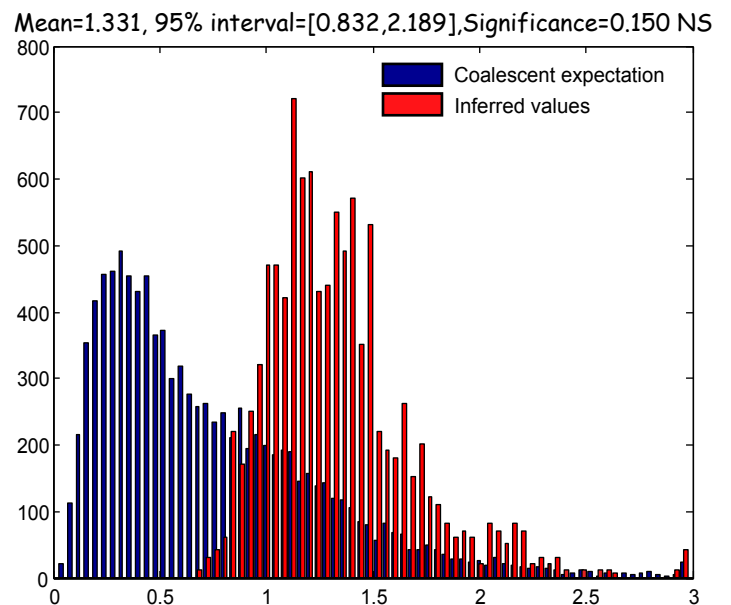

Supplement: ismej2011160x3.pdf [file ismej2011160x3.pdf]
