# Supplementary material
Source: PubMed Central journal article supplement (PMC3329105)

Figure S1A

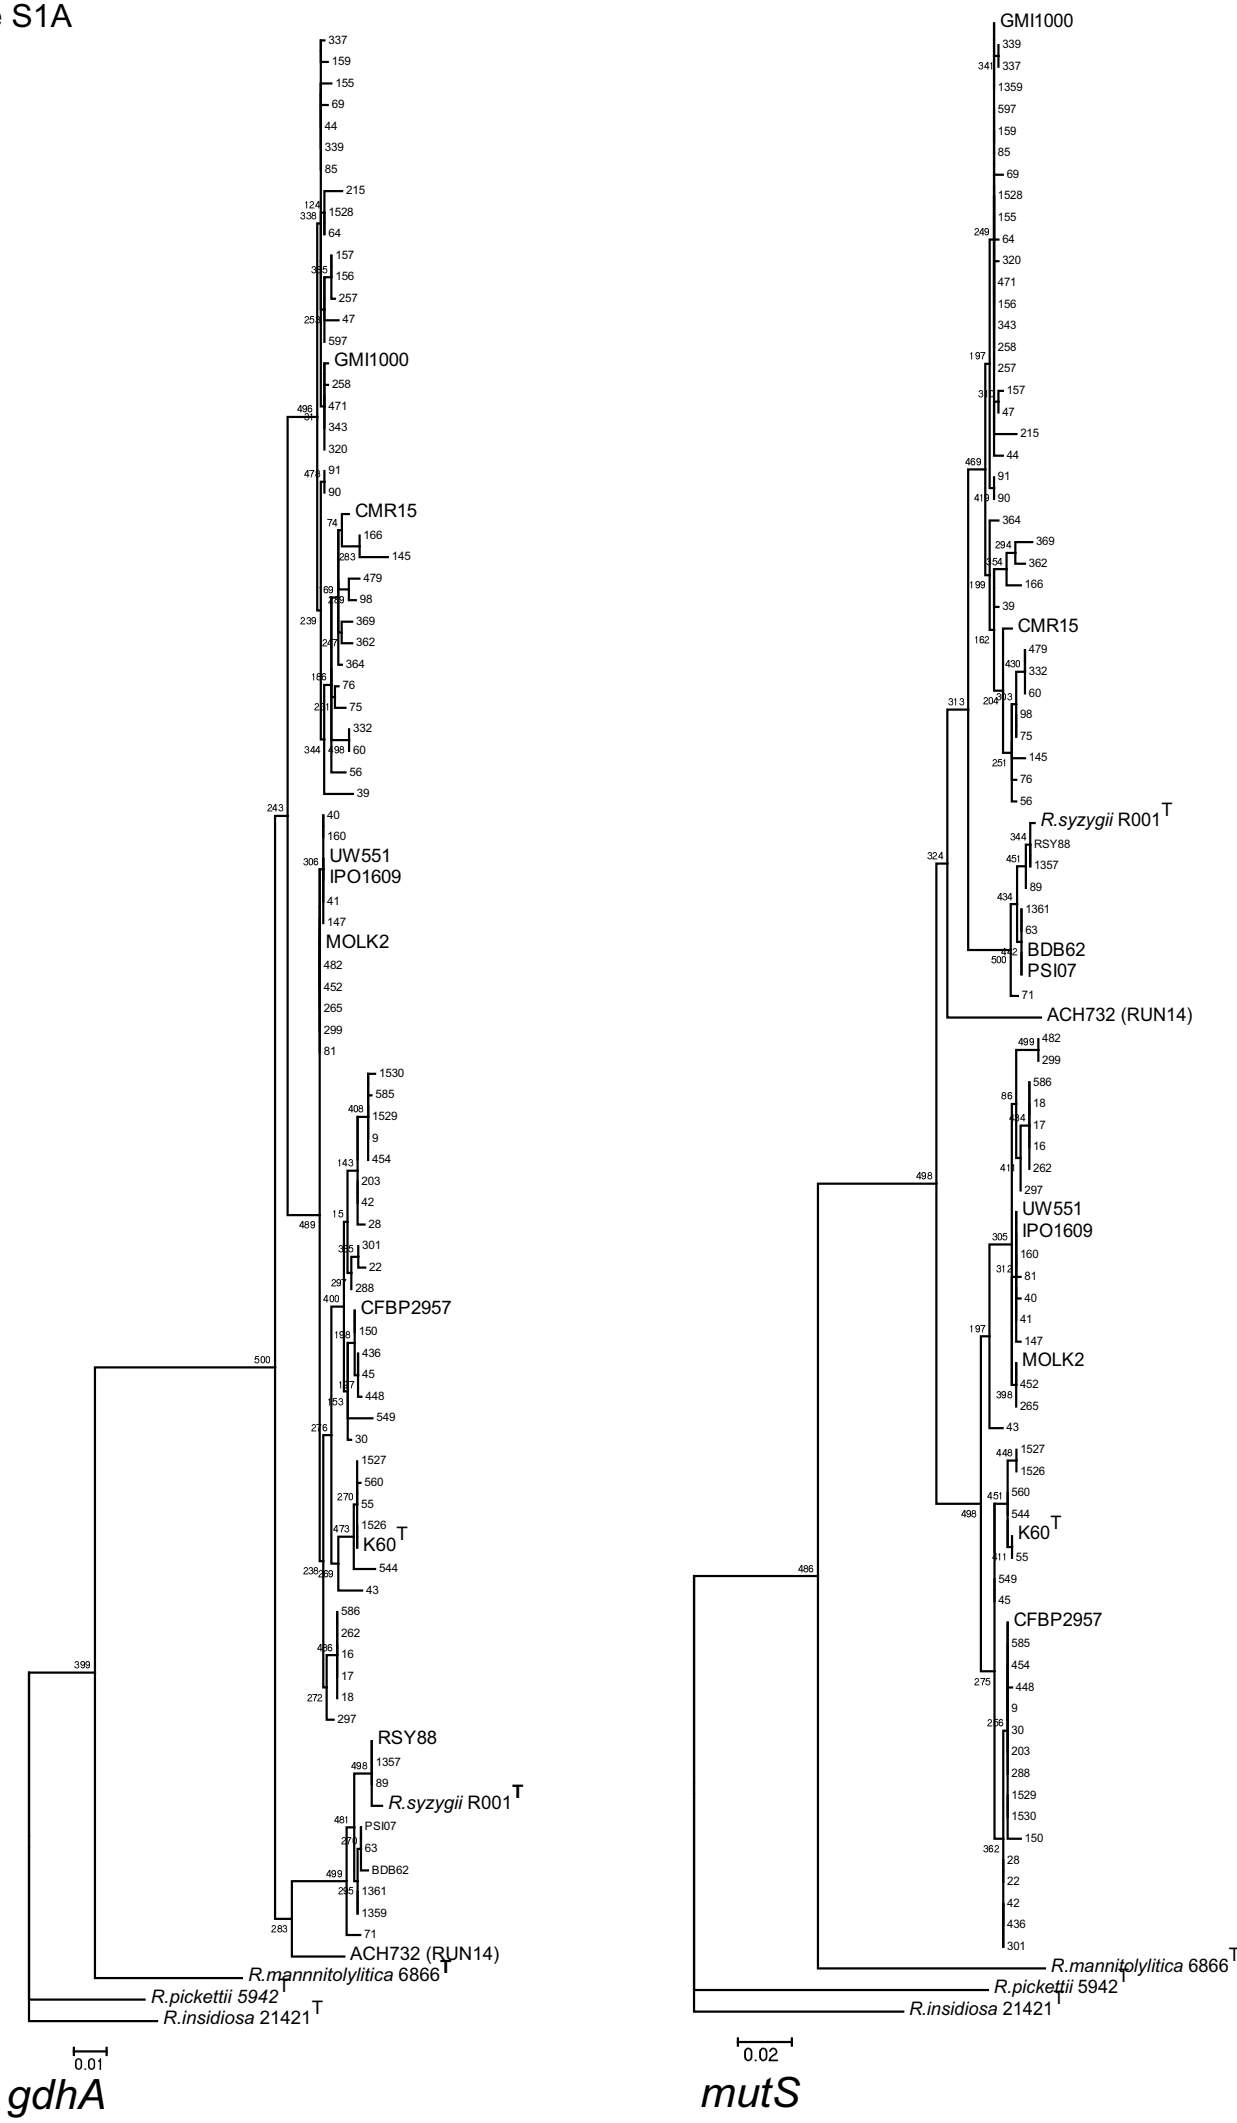

Fig S1B

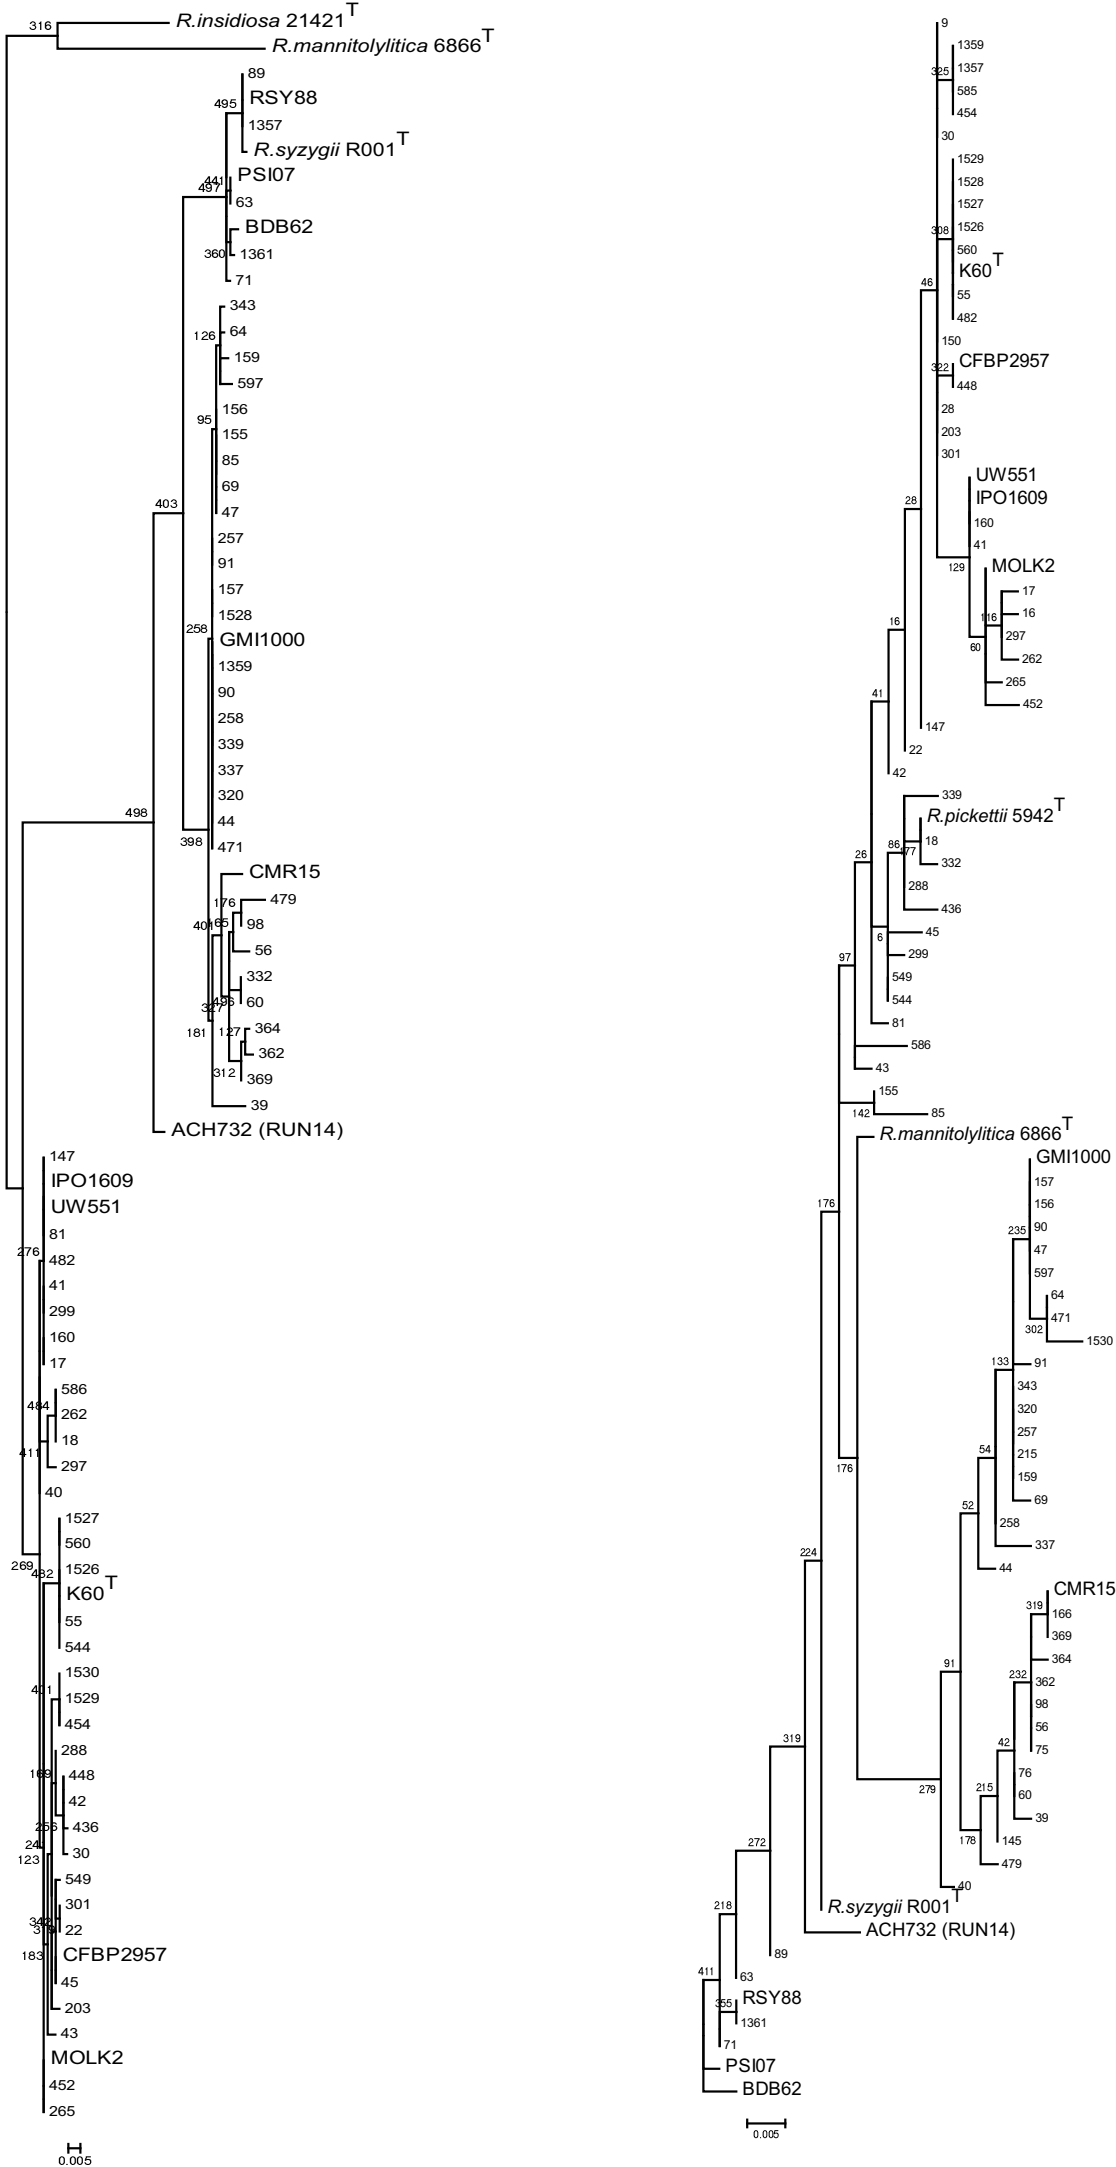

*ppsA*

*adk*

Fig S1 C

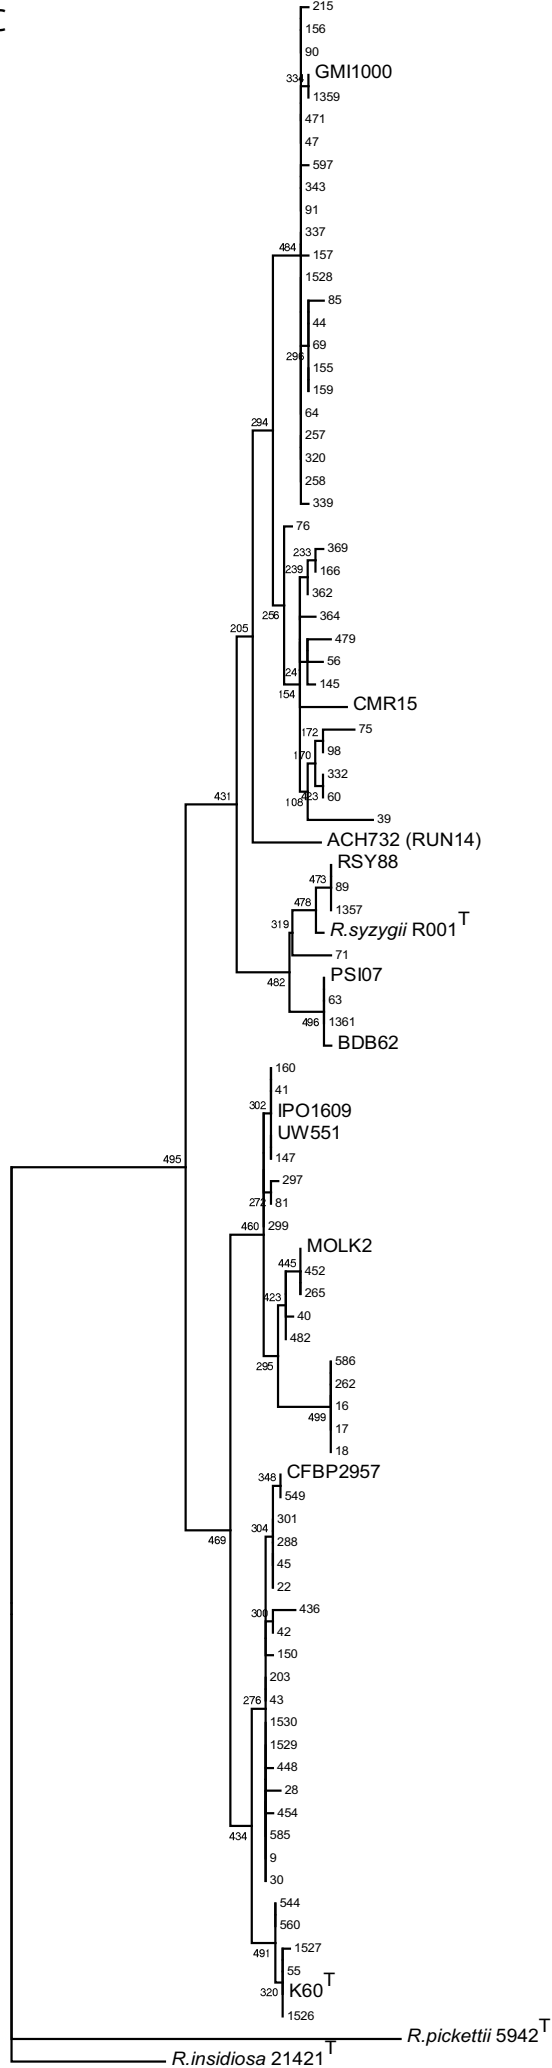

*LeuS*

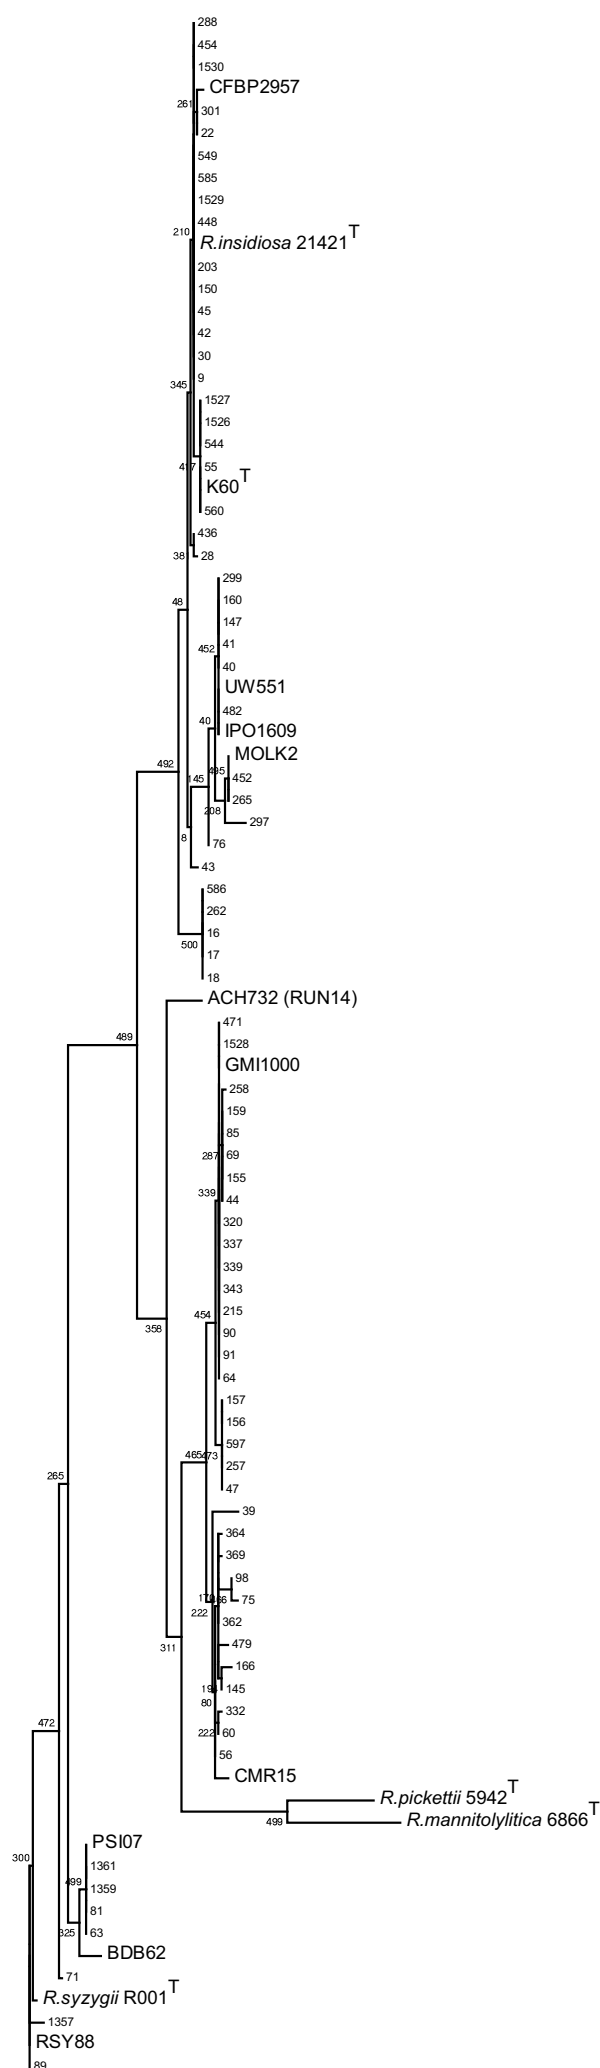

*rplB*

Fig. S1D

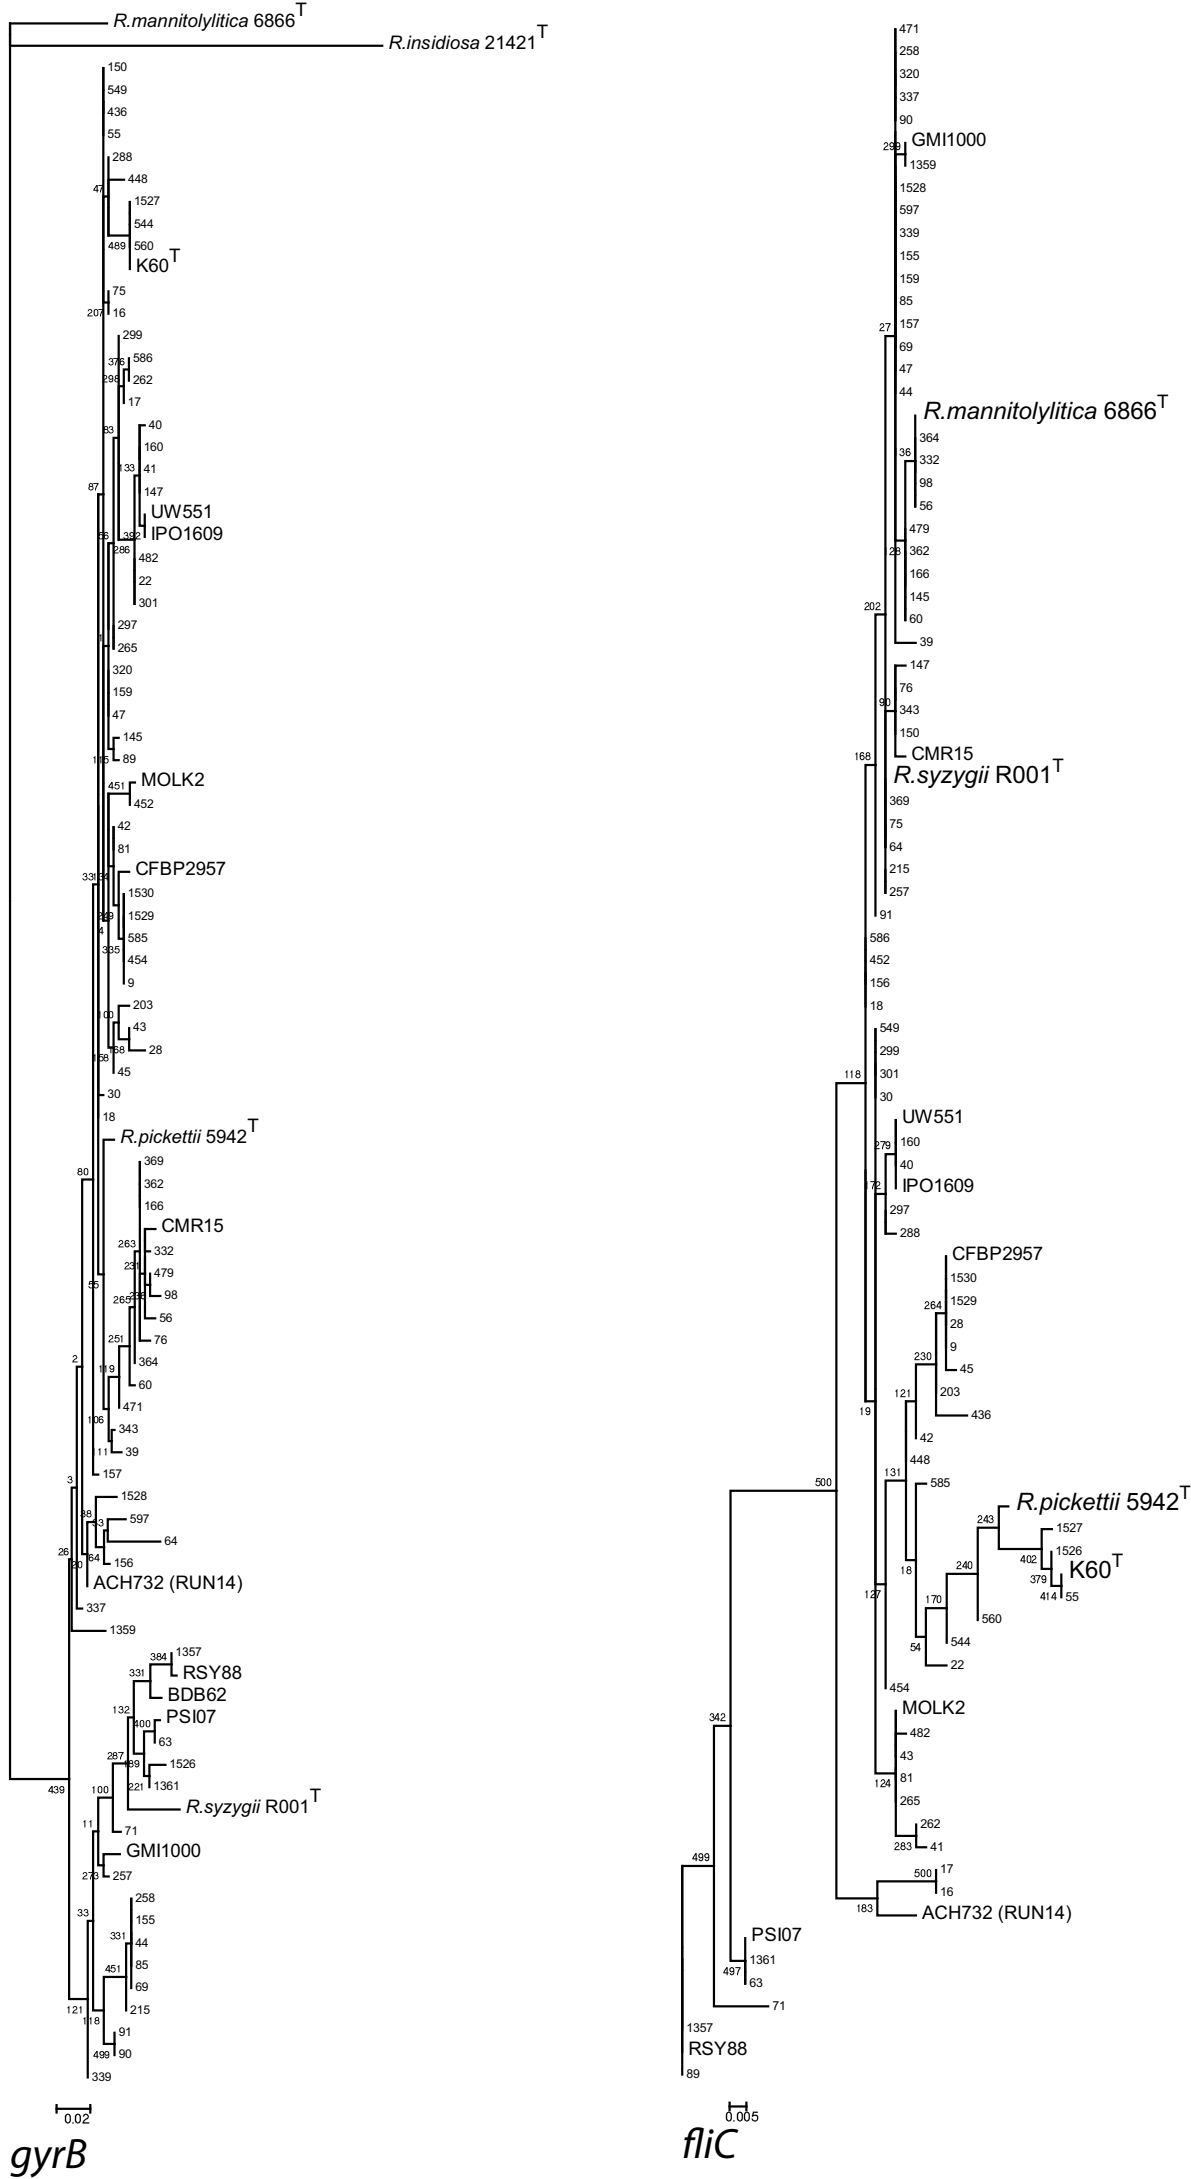

Fig S1E

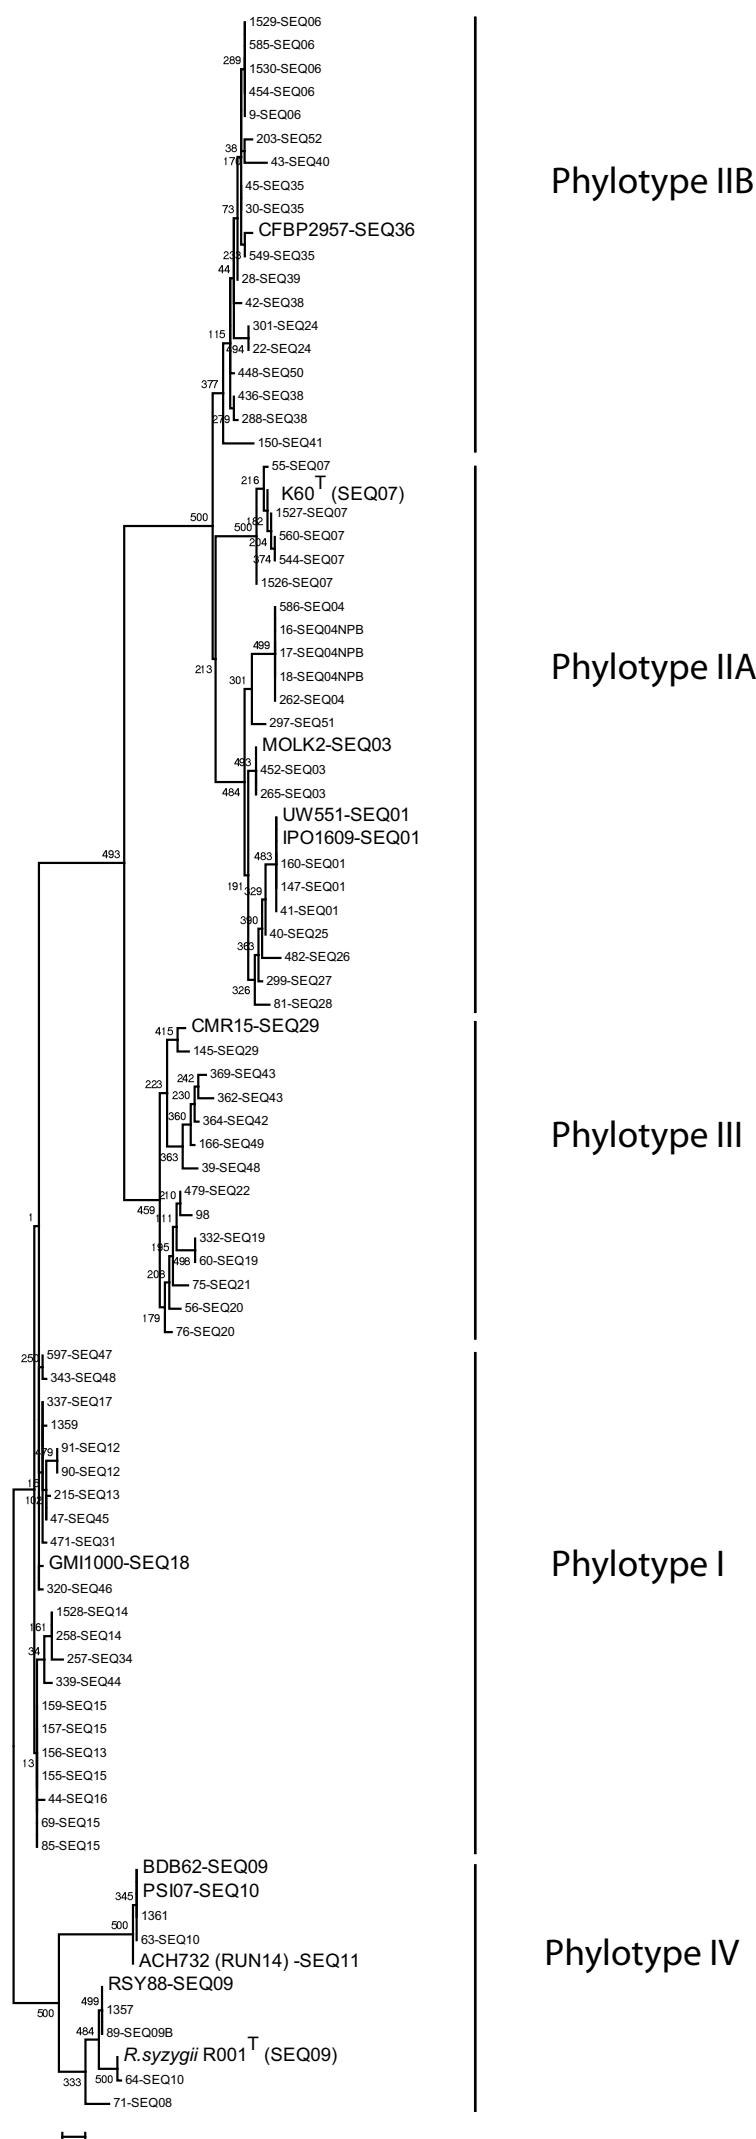

*Egl*

Supplement: ismej2011160x1.pdf [file ismej2011160x1.pdf]

Figure S2

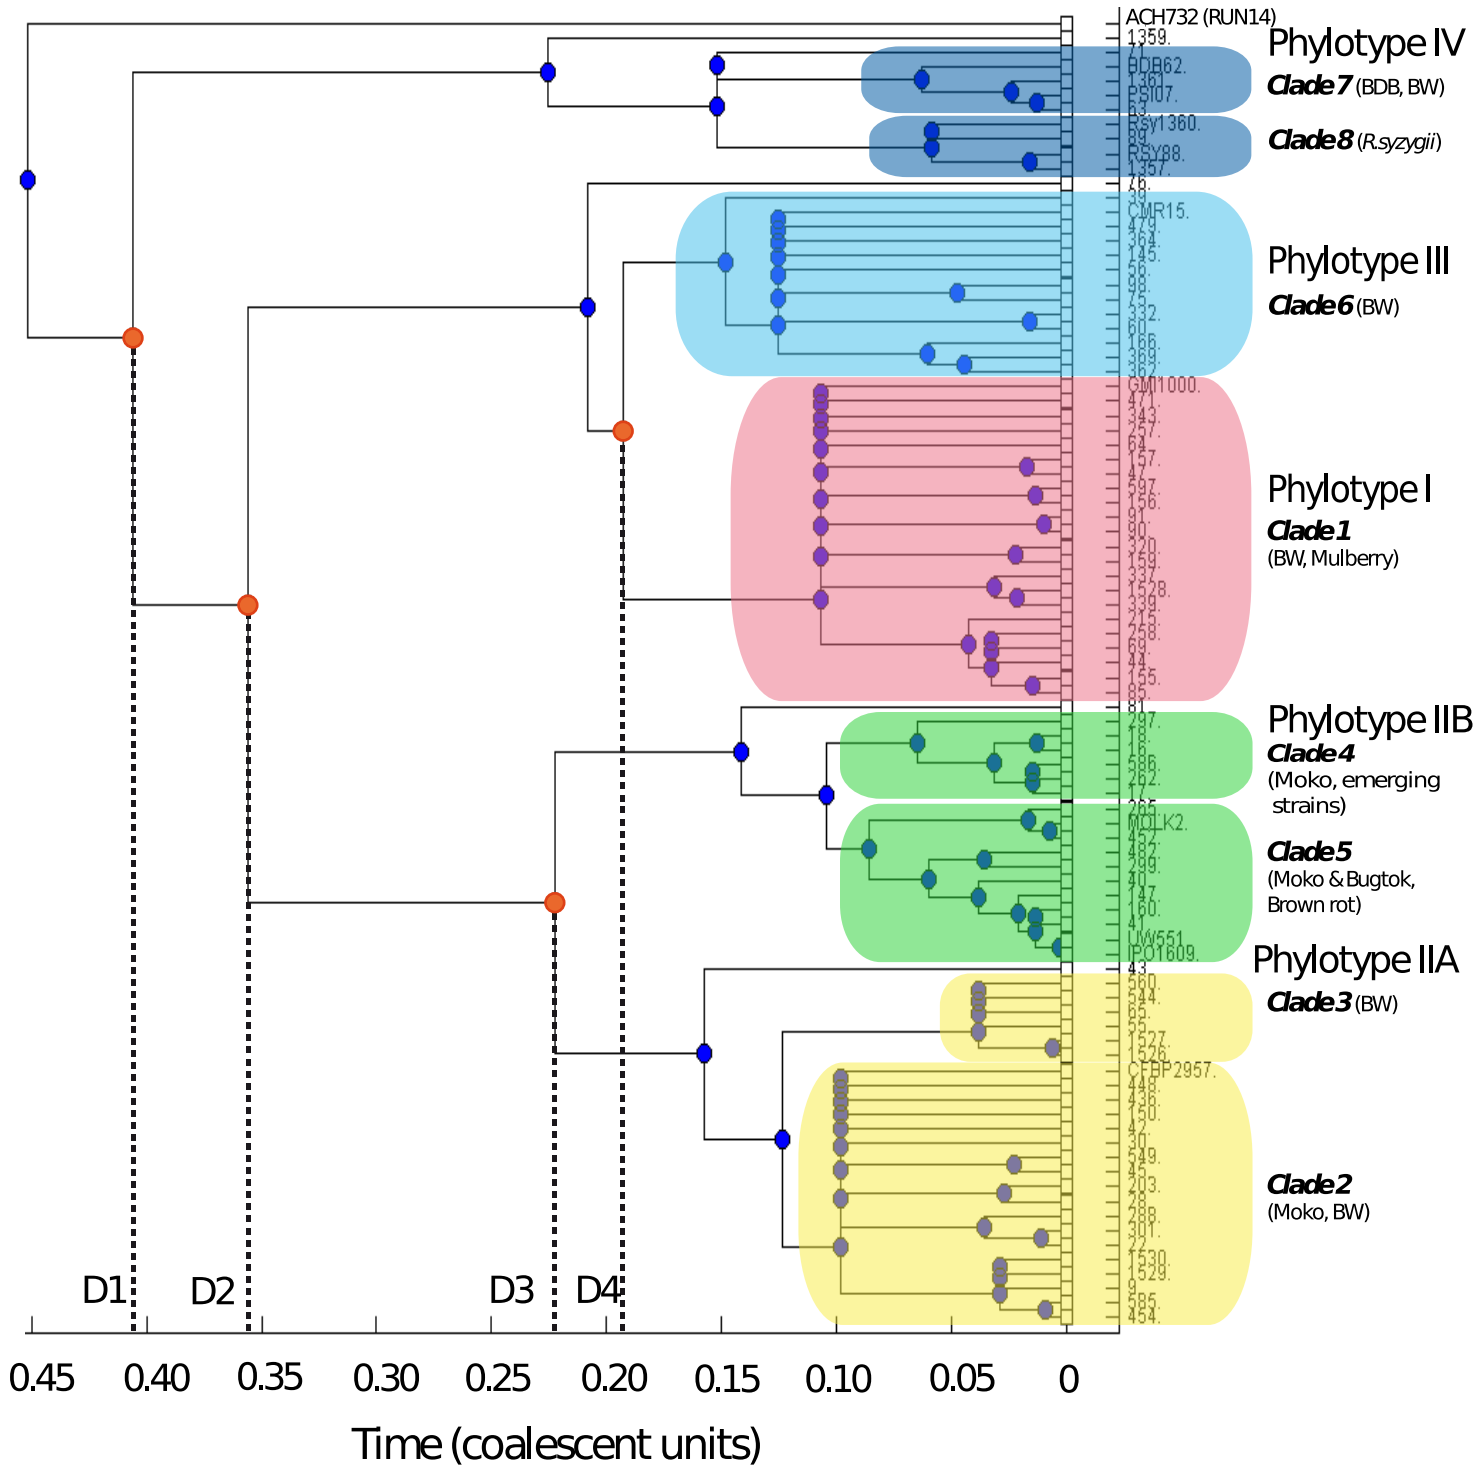

Supplement: ismej2011160x2.pdf [file ismej2011160x2.pdf]

Figure S4

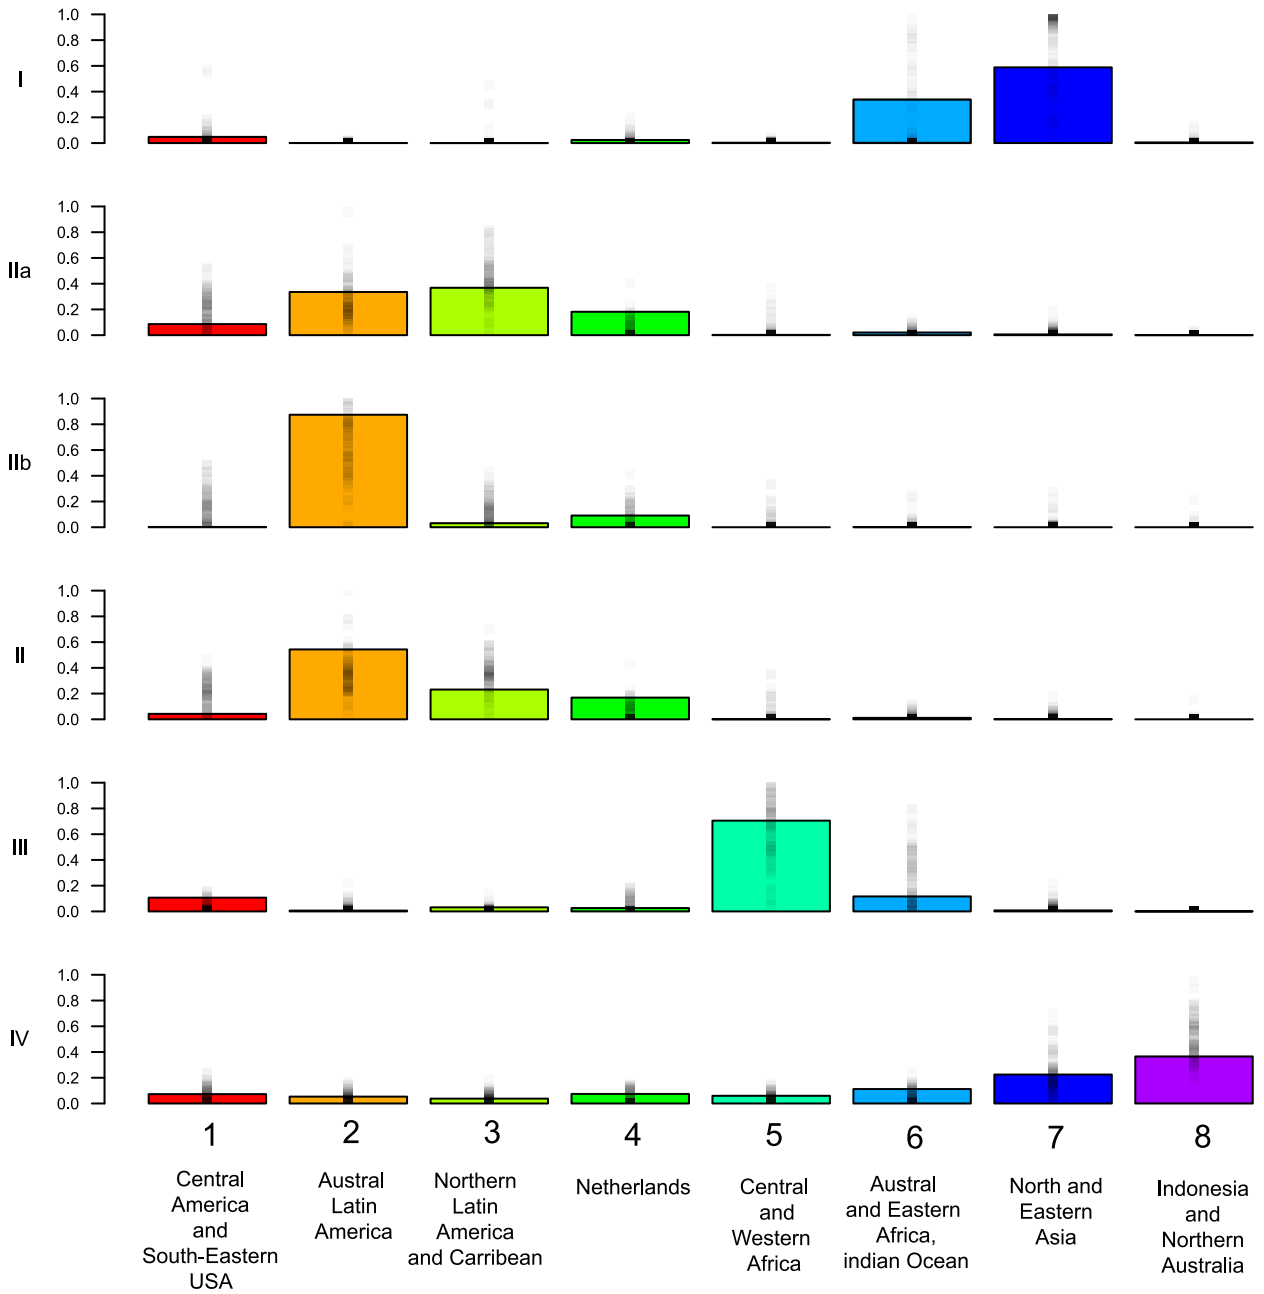

Supplement: ismej2011160x4.pdf [file ismej2011160x4.pdf]

Figure S5

0.0010

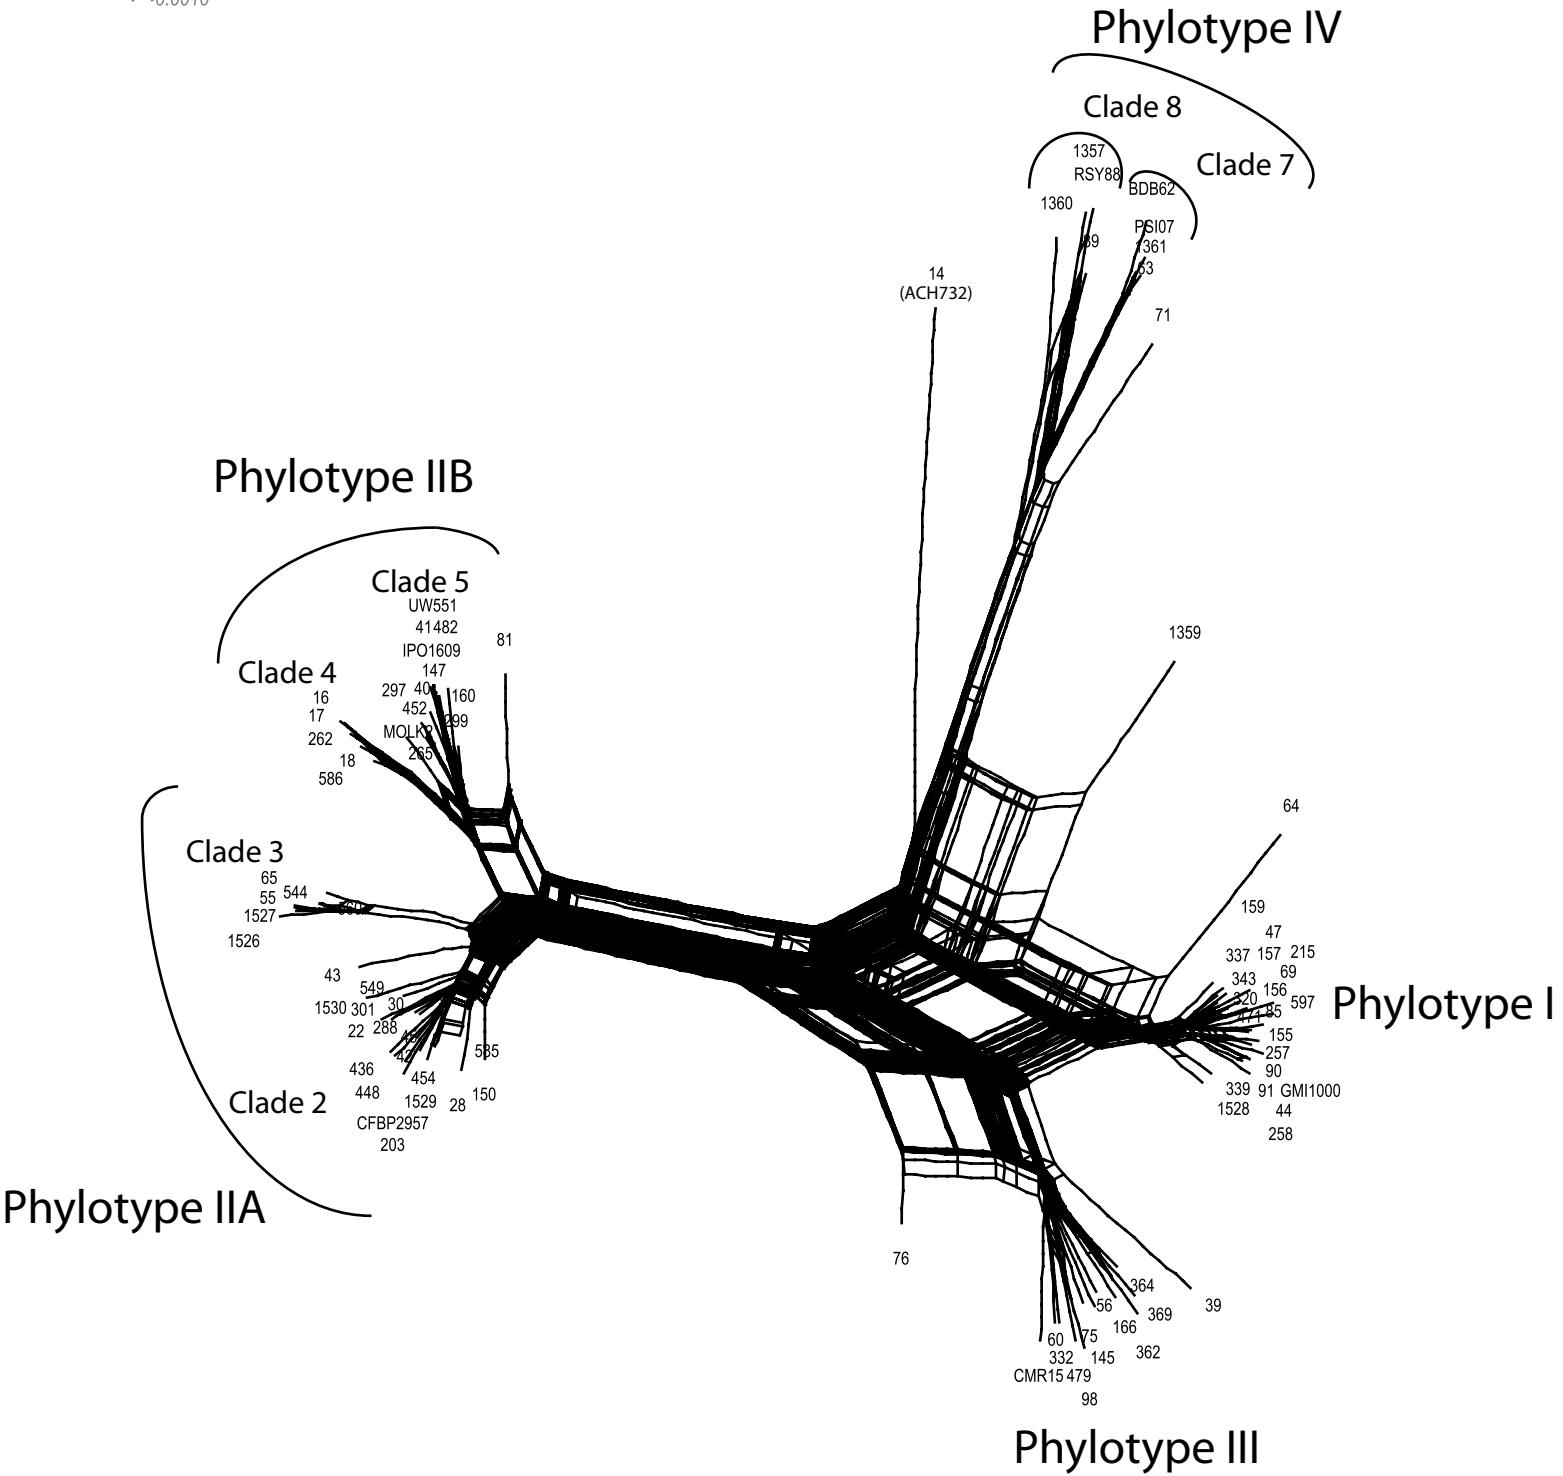

Supplement: ismej2011160x5.pdf [file ismej2011160x5.pdf]

Figure S6

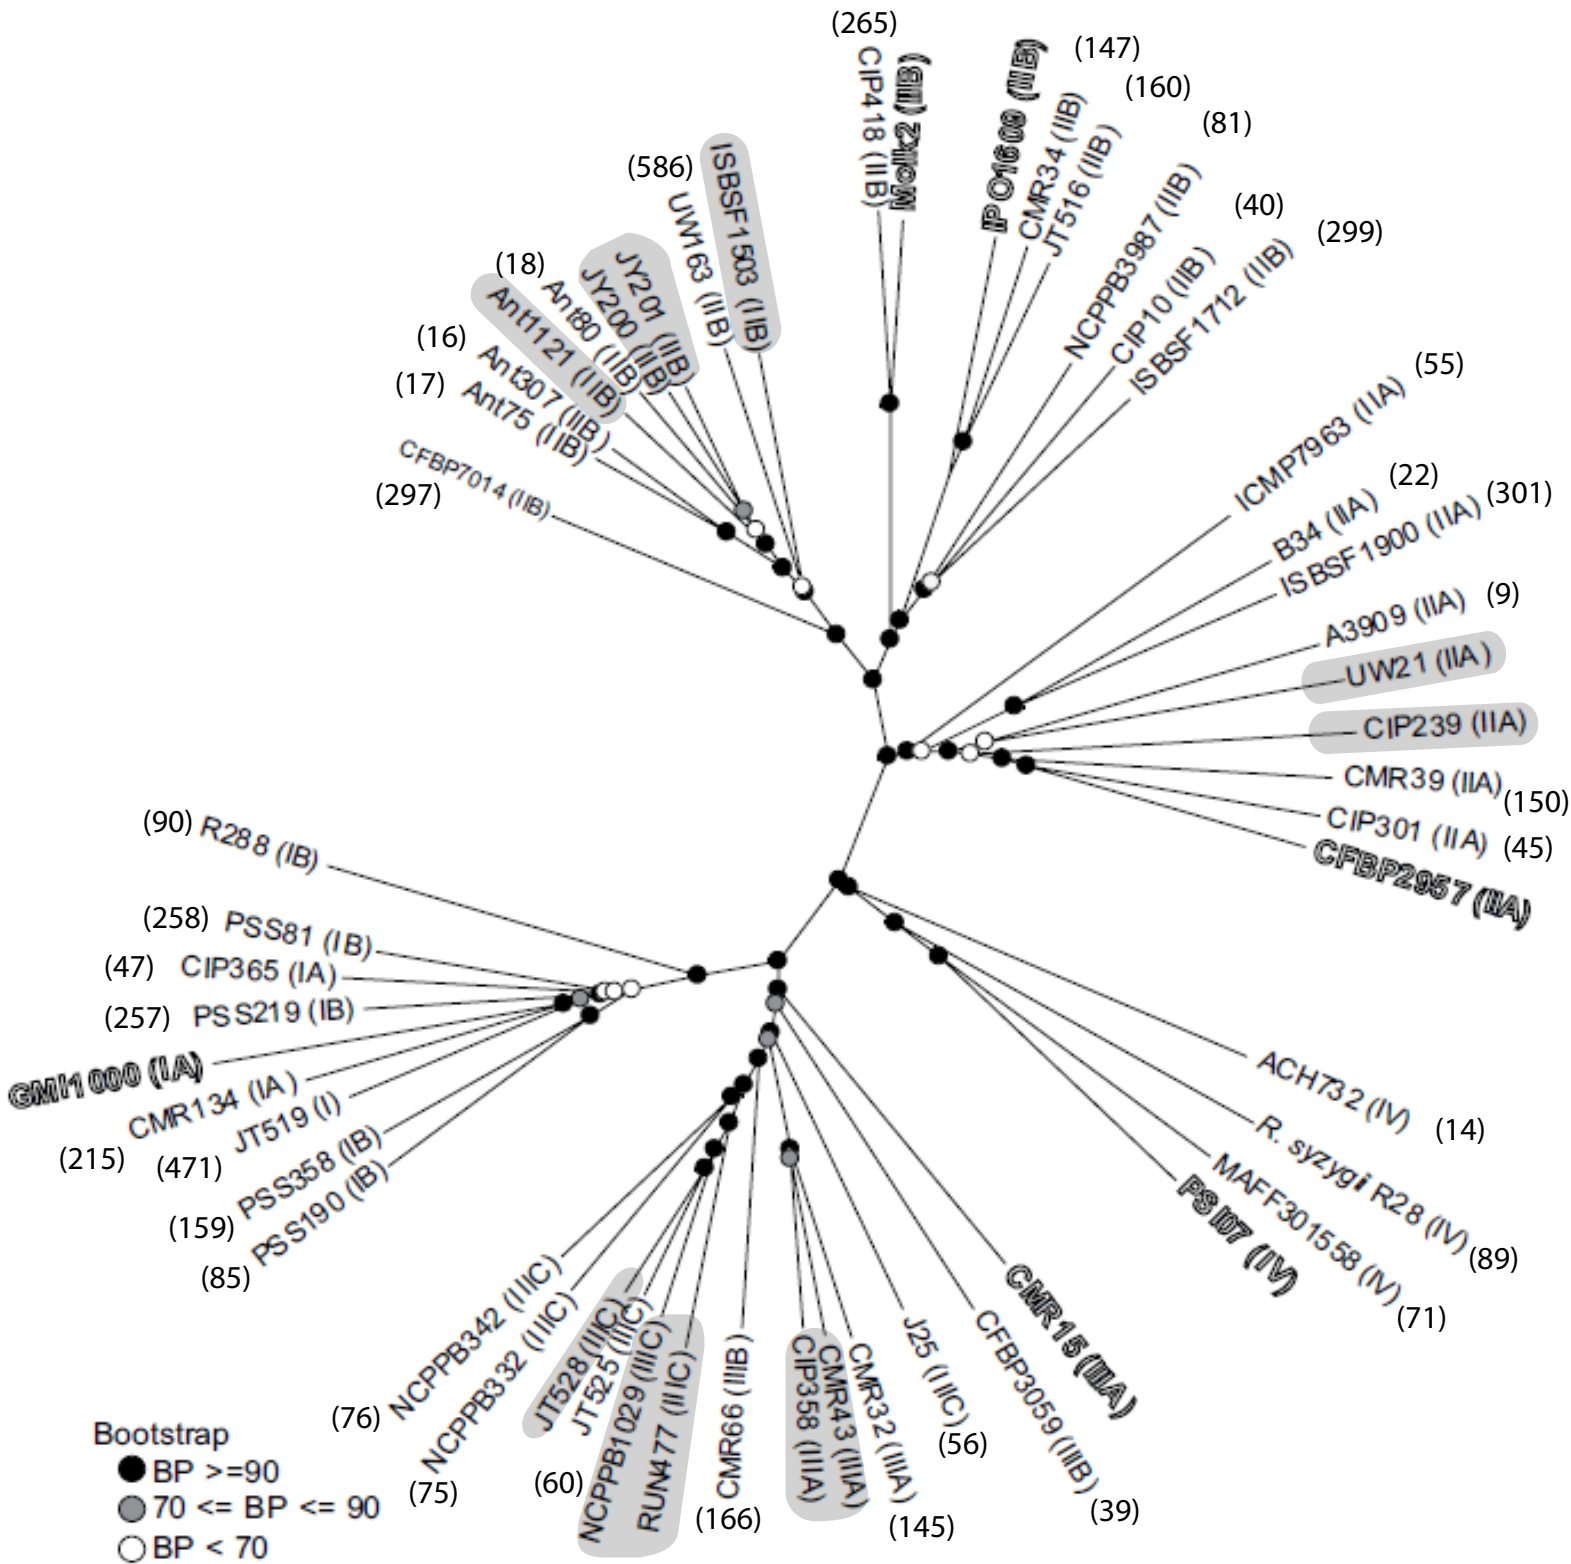

Supplement: ismej2011160x6.pdf [file ismej2011160x6.pdf]
